# Supplementary material for: A novel nonsense mutation in the tyrosinase gene is related to the albinism in a capuchin monkey (Sapajus apella)
Source: PubMed Central journal article supplement (PMC5420114; doi:10.1186/s12863-017-0504-8), 2017-05-05
Supplement: 12863_2017_504_MOESM1_ESM.pdf [file 12863_2017_504_MOESM1_ESM.pdf]

SUPPLEMENTARY TABLE 1: GenBank accession numbers and geographic coordinates for robust capuchin samples from GenBank used in this study.

| Sample N°<br>(from Lima et al., 2016, in press) | Species (Rylands et al., 2013) | Subclade Assignment for <i>Sapajus</i> |  | LAT    | LONG   | GenBank Accession N° Cyt <i>b</i> | GenBank Accession N° Dloop |
|-------------------------------------------------|--------------------------------|----------------------------------------|--|--------|--------|-----------------------------------|----------------------------|
|                                                 |                                | CLADE 4 (Lima et al., 2016, in press)  |  |        |        |                                   |                            |
| 1                                               | <i>S. flavius</i>              | 1                                      |  | -6.56  | -35.13 | KY173296                          | KY173187                   |
| 2                                               | <i>S. flavius</i>              | 1                                      |  | -7.01  | -34.96 | KY173297                          | KY173188                   |
| 3                                               | <i>S. flavius</i>              | 1                                      |  | -7.02  | -35.09 | KY173298                          | KY173189                   |
| 4A                                              | <i>S. xanthosternos</i>        |                                        |  | -14.79 | -39.05 | KY173340                          | KY173233                   |
| 4B                                              | <i>S. xanthosternos</i>        |                                        |  | -14.79 | -39.05 | KY173341                          | KY173234                   |
| 5                                               | <i>S. xanthosternos</i>        |                                        |  | -15.17 | -39.07 | KY173343                          | KY173236                   |
| 6                                               | <i>S. xanthosternos</i>        |                                        |  | -15.41 | -39.50 | KY173342                          | KY173235                   |
| C                                               | <i>S. robustus</i>             |                                        |  | -      | -      | KY173339                          | KY173231                   |
| 15                                              | <i>S. nigrinus</i>             |                                        |  | -23.94 | -54.22 | KY173338                          | KY173230                   |
| 17                                              | <i>S. libidinosus</i>          | 2                                      |  | -2.77  | -41.81 | KY173300                          | KY173191                   |
| 18                                              | <i>S. libidinosus</i>          | 2                                      |  | -2.8   | -41.87 | KY173301                          | KY173192                   |
| 19                                              | <i>S. libidinosus</i>          | 2                                      |  | -2.85  | -41.83 | KY173302                          | KY173193                   |
| 20                                              | <i>S. libidinosus</i>          | 2                                      |  | -5.09  | -42.43 | KY173299                          | KY173190                   |
| 21                                              | <i>S. libidinosus</i>          | 2                                      |  | -7.93  | -44.20 | KY173303                          | KY173194                   |
| 22                                              | <i>S. libidinosus</i>          | 2                                      |  | -5.28  | -48.30 | KY173304                          | KY173195                   |
| 23A                                             | <i>S. libidinosus</i>          | 2                                      |  | -14.14 | -48.17 | KY173307                          | KY173197                   |
| 23B                                             | <i>S. libidinosus</i>          | 2                                      |  | -14.14 | -48.17 | KY173306                          | KY173198                   |
| 26                                              | <i>S. libidinosus</i>          | 2                                      |  | -16.6  | -49.26 | KY173308                          | KY173199                   |
| 27                                              | <i>S. libidinosus</i>          | 2                                      |  | -16.11 | -50.30 | KY173305                          | KY173196                   |
| 29                                              | <i>S. cay</i>                  | 3                                      |  | -16.06 | -57.72 | KY173295                          | KY173186                   |
| 32A                                             | <i>S. apella</i>               | 2                                      |  | -6.15  | -49.56 | KY173275                          | KY173166                   |
| 32B                                             | <i>S. apella</i>               | 2                                      |  | -6.15  | -49.56 | KY173276                          | KY173167                   |
| 33A                                             | <i>S. apella</i>               | 2                                      |  | -3.83  | -49.64 | KY173259                          | KY173151                   |
| 33B                                             | <i>S. apella</i>               | 2                                      |  | -3.83  | -49.64 | KY173255                          | KY173147                   |
| 33C                                             | <i>S. apella</i>               | 2                                      |  | -3.83  | -49.64 | KY173256                          | KY173148                   |
| 33D                                             | <i>S. apella</i>               | 2                                      |  | -3.83  | -49.64 | KY173258                          | KY173150                   |
| 33E                                             | <i>S. apella</i>               | 2                                      |  | -3.83  | -49.64 | KY173257                          | KY173149                   |
| 41                                              | <i>S. apella</i>               | 5                                      |  | 3.22   | -52.03 | KY173253                          | KY173145                   |
| 42                                              | <i>S. apella</i>               | 5                                      |  | 0.83   | -53.93 | KY173266                          | KY173158                   |
| 43                                              | <i>S. apella</i>               | 5                                      |  | 0.63   | -55.73 | KY173268                          | KY173160                   |

|     |                         |   |        |        |          |          |
|-----|-------------------------|---|--------|--------|----------|----------|
| 44A | <i>S. apella</i>        | 5 | -0.17  | -55.19 | KY173263 | KY173155 |
| 44B | <i>S. apella</i>        | 5 | -0.17  | -55.19 | KY173264 | KY173156 |
| 45  | <i>S. apella</i>        | 5 | -0.96  | -55.52 | KY173262 | KY173154 |
| 47  | <i>S. apella</i>        | 5 | 1.29   | -58.70 | KY173265 | KY173157 |
| 49  | <i>S. apella</i>        | 5 | -1.92  | -59.47 | KY173290 | KY173181 |
| 52  | <i>S. apella</i>        | 5 | -2.47  | -58.40 | KY173288 | KY173179 |
| 53  | <i>S. apella</i>        | 5 | -2.6   | -56.18 | KY173277 | KY173168 |
| 54  | <i>S. apella</i>        | 5 | -3.18  | -55.80 | KY173282 | KY173173 |
| 59A | <i>S. apella</i>        | 4 | -9.6   | -56.01 | KY173285 | KY173176 |
| 59B | <i>S. apella</i>        | 4 | -9.6   | -56.01 | KY173286 | KY173177 |
| 59C | <i>S. apella</i>        | 4 | -10    | -56.04 | KY173283 | KY173174 |
| 59D | <i>S. apella</i>        | 4 | -10    | -56.04 | KY173284 | KY173175 |
| 61  | <i>S. apella</i>        | 3 | -12.56 | -63.44 | KY173281 | KY173172 |
| 62  | <i>S. apella</i>        | 3 | -12.5  | -63.53 | KY173293 | KY173184 |
| 63  | <i>S. macrocephalus</i> | 5 | -3.37  | -60.48 | KY173313 | KY173204 |
| 64  | <i>S. macrocephalus</i> | 5 | -4.44  | -60.32 | KY173312 | KY173203 |
| 66  | <i>S. macrocephalus</i> | 6 | -4.86  | -61.41 | KY173324 | KY173216 |
| 67A | <i>S. macrocephalus</i> | 6 | -4.99  | -62.96 | KY173329 | KY173221 |
| 67B | <i>S. macrocephalus</i> | 6 | -4.99  | -62.96 | KY173327 | KY173219 |
| 68  | <i>S. macrocephalus</i> | 6 | -5.69  | -63.24 | KY173328 | KY173220 |
| 71A | <i>S. macrocephalus</i> | 6 | -8.89  | -63.24 | KY173260 | KY173152 |
| 71B | <i>S. macrocephalus</i> | 6 | -8.89  | -63.24 | KY173261 | KY173153 |
| 71C | <i>S. macrocephalus</i> | 6 | -8.89  | -63.24 | KY173310 | KY173201 |
| 72  | <i>S. macrocephalus</i> | 6 | -8.67  | -62.37 | KY173332 | KY173224 |
| 75  | <i>S. macrocephalus</i> | 5 | -2.47  | -64.83 | KY173318 | KY173209 |
| 76  | <i>S. macrocephalus</i> | 6 | -2.59  | -64.89 | KY173319 | KY173210 |
| 77A | <i>S. macrocephalus</i> | 6 | -2.45  | -65.36 | KY173320 | KY173211 |
| 78  | <i>S. macrocephalus</i> | 5 | -1.05  | -62.89 | KY173316 | KY173207 |
| 79  | <i>S. macrocephalus</i> | 5 | -0.48  | -64.41 | KY173315 | KY173206 |
| 80  | <i>S. macrocephalus</i> | 5 | -0.61  | -64.92 | KY173330 | KY173222 |
| 81  | <i>S. macrocephalus</i> | 5 | -0.23  | -66.85 | KY173325 | KY173217 |
| 82  | <i>S. macrocephalus</i> | 5 | -1.84  | -69.03 | KY173326 | KY173218 |
| 85  | <i>S. macrocephalus</i> | 6 | -4.4   | -70.14 | KY173317 | KY173208 |
